# Supplementary material
Source: HighWire-hosted journal article supplement (https://breathe.ersjournals.com/content/16/2/190328)
Supplement: inline-supplementary-material-2 [file inline-supplementary-material-2.pdf]

| <b>Organisation</b>                       | <b>Title</b>                                                                 | <b>Reference</b>                                                                                                                                                                                                                                                                                                                                                                           | <b>Summary</b>                                                                                                                                                                                                                                              |
|-------------------------------------------|------------------------------------------------------------------------------|--------------------------------------------------------------------------------------------------------------------------------------------------------------------------------------------------------------------------------------------------------------------------------------------------------------------------------------------------------------------------------------------|-------------------------------------------------------------------------------------------------------------------------------------------------------------------------------------------------------------------------------------------------------------|
| Cystic Fibrosis Foundation                | Infection Prevention and Control Guidelines for Cystic Fibrosis: 2013 Update | Saiman L, Siegel JD, LiPuma JJ, Brown RF, Bryson EA, Chambers MJ, Downer VS, Fliege J, Hazle LA, Jain M, Marshall BC, O'Malley C, Pattee SR, Potter-Bynoe G, Reid S, Robinson KA, Sabadosa KA, Schmidt HJ, Tullis E. Infection prevention and control guideline for cystic fibrosis: 2013 update. <i>Infect Control Hosp Epidemiol</i> 2014;35(Suppl 1): 1-67.                             | Guideline providing recommendations to prevent patients with CF from transmitting and/or acquiring pathogens from others or the environment. Cleaning and disinfection of nebulisers at home and in hospital included.                                      |
| American Association for Respiratory Care | A guide to Aerosol delivery devices for Respiratory Therapists 4th edition   | Gardenhire DS, Burnett D, Strickland S, Myers TR. A Guide to Aerosol Therapy Delivery Devices for Respiratory Therapists 4 <sup>th</sup> Edition. [online] Available at: <a href="http://www.aarc.org/resources/clinical-resources/aerosol-resources">http://www.aarc.org/resources/clinical-resources/aerosol-resources</a> [Accessed 15/08/19]                                           | Guideline on aerosol therapy devices and medications. Cleaning and disinfection methods discussed. Table of cleaning steps provided. Advice for in-hospital cleaning.                                                                                       |
| British Thoracic Society                  | Guideline for Non-CF Bronchiectasis                                          | Pasteur, M., Bilton, D. and Hill, A. (2010). British Thoracic Society Guideline for Non-CF Bronchiectasis. <i>Thorax</i> , 65(Suppl 1), pp.i1-i58.                                                                                                                                                                                                                                         | Guideline for the management of Non-CF bronchiectasis. Good practise points offered for nebuliser cleaning and advice to follow manufacturers' instructions. "A universal Code of Practice for the maintenance and re-use of equipment should be produced." |
| Centres for Disease Control & Prevention  | Guidelines for Preventing Healthcare Associated Pneumonia                    | Tablan OB, Anderson LJ, Besser R, Bridges C, Hajjeh RC (2003). Guidelines for Preventing Health-Care-Associated Pneumonia. Recommendations of CDC and the Healthcare Infection Control Practices Advisory Committee. [online] Available at: <a href="http://www.cdc.gov/mmwr/preview/mmwrhtml/rr5303a1.htm">http://www.cdc.gov/mmwr/preview/mmwrhtml/rr5303a1.htm</a> [Accessed 15/08/19]. | Guideline to reduce the incidence of hospital acquired pneumonia. General measures given on sterilisation, disinfection and maintenance of equipment and devices.                                                                                           |
| European Respiratory Society              | European Respiratory Society Guidelines on the use of nebulizers             | Co, Boe, J., Dennis, J., O'Driscoll, B., Members, Bauer, T., Carone, M., Dautzenberg, B., Diot, P., Heslop, K. and Lannefors, L. (2001). European Respiratory Society Guidelines on the use of nebulizers. Guidelines prepared by a European Respiratory Society Task Force on the use of nebulizers. <i>European Respiratory Journal</i> , 18(1), pp.228-242.                             | Guidelines for users of nebulized treatment in Europe. Cleaning and disinfection of nebulisers should be carried out on a regular basis in line with manufacturer's instructions. The ideal standards and methods have not been well established.           |
