# Supplementary material
Source: HighWire-hosted journal article supplement (https://breathe.ersjournals.com/content/16/2/190328)
Supplement: inline-supplementary-material-3 [file inline-supplementary-material-3.pdf]

| MANUFACTURER        | WEB LINK/REFERENCE                                                                                                                                                                                                                                                                                                                                                                        | NAME OF DEVICE                                     | TYPE                | RECOMMENDATIONS                                                                                                                                                                                         |                                                                                                                                                      |                                 | OTHER                                                                                                                                                                                                                                                                                                                                                                                                                                                                                                                                                                                | REPLACE                                                               |                                                                                                                     |                          |                                                                                                                                                                                  |                      |
|---------------------|-------------------------------------------------------------------------------------------------------------------------------------------------------------------------------------------------------------------------------------------------------------------------------------------------------------------------------------------------------------------------------------------|----------------------------------------------------|---------------------|---------------------------------------------------------------------------------------------------------------------------------------------------------------------------------------------------------|------------------------------------------------------------------------------------------------------------------------------------------------------|---------------------------------|--------------------------------------------------------------------------------------------------------------------------------------------------------------------------------------------------------------------------------------------------------------------------------------------------------------------------------------------------------------------------------------------------------------------------------------------------------------------------------------------------------------------------------------------------------------------------------------|-----------------------------------------------------------------------|---------------------------------------------------------------------------------------------------------------------|--------------------------|----------------------------------------------------------------------------------------------------------------------------------------------------------------------------------|----------------------|
|                     |                                                                                                                                                                                                                                                                                                                                                                                           |                                                    |                     | wash                                                                                                                                                                                                    | rinse after washing                                                                                                                                  | frequency of washing            |                                                                                                                                                                                                                                                                                                                                                                                                                                                                                                                                                                                      |                                                                       | disinfect                                                                                                           | rinse after disinfection | dry                                                                                                                                                                              | freq of disinfecting |
| Philips Respironics | SideStream Plus Reusable high efficiency nebulizer Instructions for Use Ref 1092001 Published 2013 Koninklijke Philips Electronics N.V. [online] Available at: <a href="https://youtu.be/qFFwRr-OM">https://youtu.be/qFFwRr-OM</a> [Accessed 15/08/19]                                                                                                                                    | SideStream Plus                                    | Breath enhanced jet | wash all items in hot soapy water                                                                                                                                                                       | rinse in clean water                                                                                                                                 | after each use                  | boil in water with 2-3 drops of dish washing liquid for 10 mins.                                                                                                                                                                                                                                                                                                                                                                                                                                                                                                                     | Rinse in clean water for 2 mins.                                      | air dry                                                                                                             | 1/week                   | may be washed once a week contained in a basket on top rack of dishwasher. To reduce risk of infection, clean and disinfect by boiling in hot water between treatments           | every 12 months      |
| Philips Respironics | SideStream reusable kit Philips Respironics Published 2018 Koninklijke Philips N.V.                                                                                                                                                                                                                                                                                                       | SideStream reusable kit                            | jet                 | wash all items (except tubing) in hot, soapy water                                                                                                                                                      | rinse all parts in clean water for 2 minutes                                                                                                         | after each use                  | boil (except mask and tubing) in water with 2-3 drops of dish washing liquid for 10 mins.                                                                                                                                                                                                                                                                                                                                                                                                                                                                                            | Rinse all parts in clean water for 2 minutes                          | air dry                                                                                                             | 1/week                   | wipe mask with dry clean cloth and air dry                                                                                                                                       | after 12 months use  |
| Philips Respironics | SideStream disposable kit Ref 448,448A Philips respironics Published 2013 Koninklijke Philips Electronics N.V.                                                                                                                                                                                                                                                                            | SideStream disposable kit                          | jet                 | wash in warm, soapy water                                                                                                                                                                               | rinse in clean, cold water                                                                                                                           | after each use                  | N/A                                                                                                                                                                                                                                                                                                                                                                                                                                                                                                                                                                                  | N/A                                                                   | N/A                                                                                                                 | N/A                      | do not immerse tubing in water. Wipe mask with clean dry cloth an air dry                                                                                                        | after 30 days use    |
| Philips Respironics | I-Neb AAD system User guide Philips Respironics Published 2015 Koninklijke Philips N.V.                                                                                                                                                                                                                                                                                                   | I-neb                                              | AAD + PMT           | place mouthpiece, medication chamber, medication lid and drug guide in (supplied) washing basket. Submerge the basket in warm soapy water (3 drops of liquid detergent) and move basket back and forth. | rinse parts (still in basket) in soft, distilled or filtered water. If the water is hard, rinse with water that has been boiled and allowed to cool. | after each use                  | submerge the parts in the washing basket, in a pan of soft, distilled or filtered water with 3 drops of liquid detergent. Bring to the boil and boil for 10 minutes.                                                                                                                                                                                                                                                                                                                                                                                                                 | rinse with soft, distilled or filtered water                          | shake off excess water and allow to air dry                                                                         | once per week            | Use an antiseptic wipe to wipe away any moisture around the horn and sensor port cover. Not suitable for dishwasher or microwave. Do not use bleach or any other cleaning agents | after 6 months       |
| Philips Respironics | Cleaning your Aerogen Go Philips Respironics 1118514 Rev 00                                                                                                                                                                                                                                                                                                                               | Aerogen Aereoneb Go                                | VMT                 | wash the nebulizer unit (medication cup & cap, nebulizer body, base and mouthpiece) in solution of warm water and dish washing soap. Do not soak                                                        | rinse under running, hot, tap water                                                                                                                  | rinse after each use wash daily | rinse under running, hot, tap water. Bring a pan of distilled water to the boil and leave parts immersed in boiling water for maximum 20 minutes                                                                                                                                                                                                                                                                                                                                                                                                                                     | N/A                                                                   | shake off excess water and allow parts to fully air dry                                                             | optional weekly          |                                                                                                                                                                                  | 1 year warranty      |
| PARI                | PARI LC Family Instructions for Use (Cleaning and disinfection at home) Published 2016 PARI Pharma GmbH. [online] Available at: <a href="https://www.pari.com/fileadmin/user_upload/PARI.com_UK/Doc/IFU/022D0098-O-de-en-IFU-LC-Family-Nebuliser.pdf">https://www.pari.com/fileadmin/user_upload/PARI.com_UK/Doc/IFU/022D0098-O-de-en-IFU-LC-Family-Nebuliser.pdf</a> [Accessed 15/08/19] | Pari LC Pari LC Plus Junior Pari Baby Pari LC Star | Breath enhanced jet | Place all disassembled components in warm tap water with a little dishwashing liquid for at least 5 minutes                                                                                             | rinse all parts thoroughly in running water                                                                                                          | after each use                  | A. place all parts in boiling water for 5 minutes. Using a clean pot and fresh water with reduced calcium content.<br>B. standard thermal disinector for baby bottles with a run time of at least 6 minutes<br>C. Microwave Disinfecter - place the product components in the disinfecter with enough space between them to allow the steam to reach all surfaces reliably.<br>850-950W 4 mins cooling time 2mins<br>600-850W 6 mins cooling time 2 mins<br>D. Chemical cleaning with disinfection carried out in a single cycle using 2% solution of Bomix*plus and soak for 5 mins | for chemical disinfection rinse all parts thoroughly in running water | place on a dry, clean and absorbent surface and let them dry completely. When dry, wrap in a clean, lint-free cloth | after cleaning           | remove all parts from pot or disinfecter as soon as disinfection has finished. Dry the parts                                                                                     | after 1 year         |

|                      |                                                                                                                                                                                                                                                                                                                                                                                                          |                                                                                                   |                     |                                                                                           |                                             |                            |                                                                                                                                                                                                                                                                                                                                                                                                                                                                                   |                                                                                          |                                                                                      |                                            |                                                                                                                                                                                                                     |                                                     |
|----------------------|----------------------------------------------------------------------------------------------------------------------------------------------------------------------------------------------------------------------------------------------------------------------------------------------------------------------------------------------------------------------------------------------------------|---------------------------------------------------------------------------------------------------|---------------------|-------------------------------------------------------------------------------------------|---------------------------------------------|----------------------------|-----------------------------------------------------------------------------------------------------------------------------------------------------------------------------------------------------------------------------------------------------------------------------------------------------------------------------------------------------------------------------------------------------------------------------------------------------------------------------------|------------------------------------------------------------------------------------------|--------------------------------------------------------------------------------------|--------------------------------------------|---------------------------------------------------------------------------------------------------------------------------------------------------------------------------------------------------------------------|-----------------------------------------------------|
| PARI                 | PARI LC SPRINT Family Instructions for Use Published 2015 PARI Pharma GmbH. [online] Available at: <a href="https://www.pari.com/fileadmin/user_upload/PARI.com-INT/Documents/IFU/023D10-01-Instructions-for-use-PARI-LC-SPRINT-Nebuliser.pdf">https://www.pari.com/fileadmin/user_upload/PARI.com-INT/Documents/IFU/023D10-01-Instructions-for-use-PARI-LC-SPRINT-Nebuliser.pdf</a> [Accessed 15/08/19] | PARI LC SPRINT PARI LC SPRINT Sinus PARI LC SPRINT Baby PARI LC SPRINT Junior PARI LC SPRINT Star | Breath enhanced jet | place all disassembled components in warm tap water with a little dish washing for 5 mins | rinse all parts thoroughly in running water | after each use             | A. boil in water for 5 mins - use a clean pot and fresh water with reduced calcium content.<br>B. standard disinfectant for baby bottles - run time of at least 6 minutes.<br>C. Microwave disinfectant - place the product components in the disinfectant with enough space between them to allow the steam to reach all surfaces reliably. 850-950W 4 mins 600-850W 6 mins plus 2 mins cooling time<br>D. Chemical Disinfection 2% solution of Bomix® plus and soak for 5 mins. | N/A if method A, B or C used.<br>For method D, rinse after disinfection in running water | place on dry, clean, absorbent surface and let dry completely                        | after cleaning                             | wrap in clean, lint-free cloth and keep in dry, dust-free environment. NOTICE<br>The LC interrupter is not designed to withstand exposure to microwaves, and must therefore not be disinfected in a microwave oven. | after 1 year                                        |
| PARI                 | Instructions for use eFlow® rapid nebuliser system Published 2018 PARI Pharma GmbH. [online] Available at: <a href="https://www.pari.com/fileadmin/user_upload/PARI.com-INT/Documents/IFU/178D10-07-Instructions-for-use-eFlow-rapid.pdf">https://www.pari.com/fileadmin/user_upload/PARI.com-INT/Documents/IFU/178D10-07-Instructions-for-use-eFlow-rapid.pdf</a> [Accessed 15/08/19]                   | Eflow® Rapid Tolero® Zirela® Altera®                                                              | VMT                 | place in warm tap water with a little dish washing for 5 mins                             | rinse under running tap water               | immediately after each use | A. Thermal disinfectant with operating time of 6 minutes B. boil in distilled water for at least 5 minutes<br>C. Chemical disinfection with quaternary ammonium compounds - suggested Bomix® plus (Bode) for 5 minutes                                                                                                                                                                                                                                                            | not specified                                                                            | place on dry, clean surface and allow to dry completely                              | at least once/day                          | store in a clean, dust-free place eg nebuliser bag<br>Microwave disinfectant not suitable                                                                                                                           | Nebuliser handset 1 year<br>Aerosol head 3-6 months |
| Omron Healthcare Inc | Omron Instruction Manual Microair® vibrating mesh technology Model NE-U22V Published OMRON Healthcare Inc. 2007. [online] Available at: <a href="https://omronhealthcare.com/products/microair-nebulizer-neu22v/">https://omronhealthcare.com/products/microair-nebulizer-neu22v/</a> [Accessed 15/08/19]                                                                                                | Microair® Model NE-U22V                                                                           | VMT                 | nebulise a small amount of distilled water for 1-2 minutes.                               | rinse with distilled water                  | after each use             | Make disinfecting solution of<br>A. 1 part white vinegar, 3 parts distilled water or<br>B. mild detergent soap (dishwashing soap in distilled water)<br>Nebulise a small amount of the solution for 1-2 minutes. Soak parts in the disinfecting solution for 10-15 minutes                                                                                                                                                                                                        | rinse with distilled water                                                               | A. gently wipe with a soft clean cloth<br>B. allow to air dry in a clean environment | daily- after the last treatment of the day | Store in storage case or in clean environment. Do not use household bleach. Do not rinse in strong running water<br>Not suitable for microwave oven                                                                 |                                                     |
