# Supplementary material
Source: HighWire-hosted journal article supplement (https://breathe.ersjournals.com/content/16/2/190328)

Supplementary Figure 1:

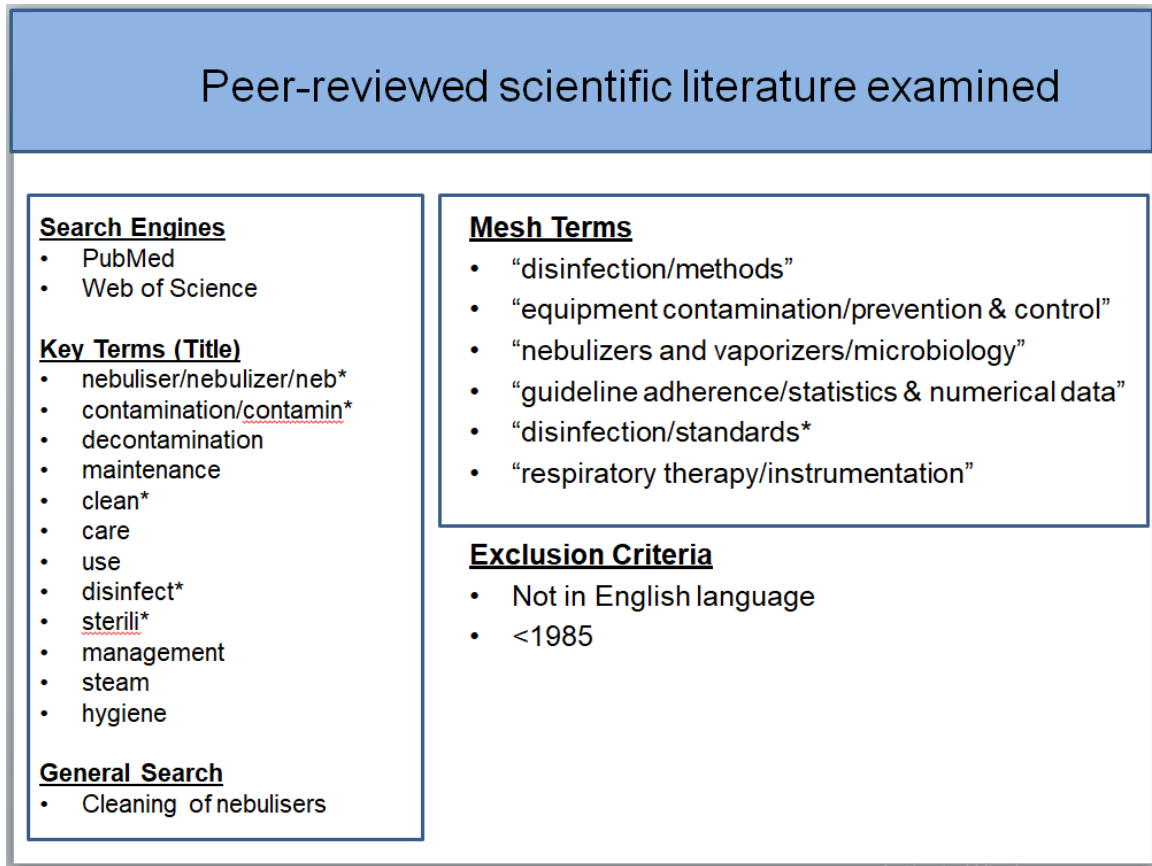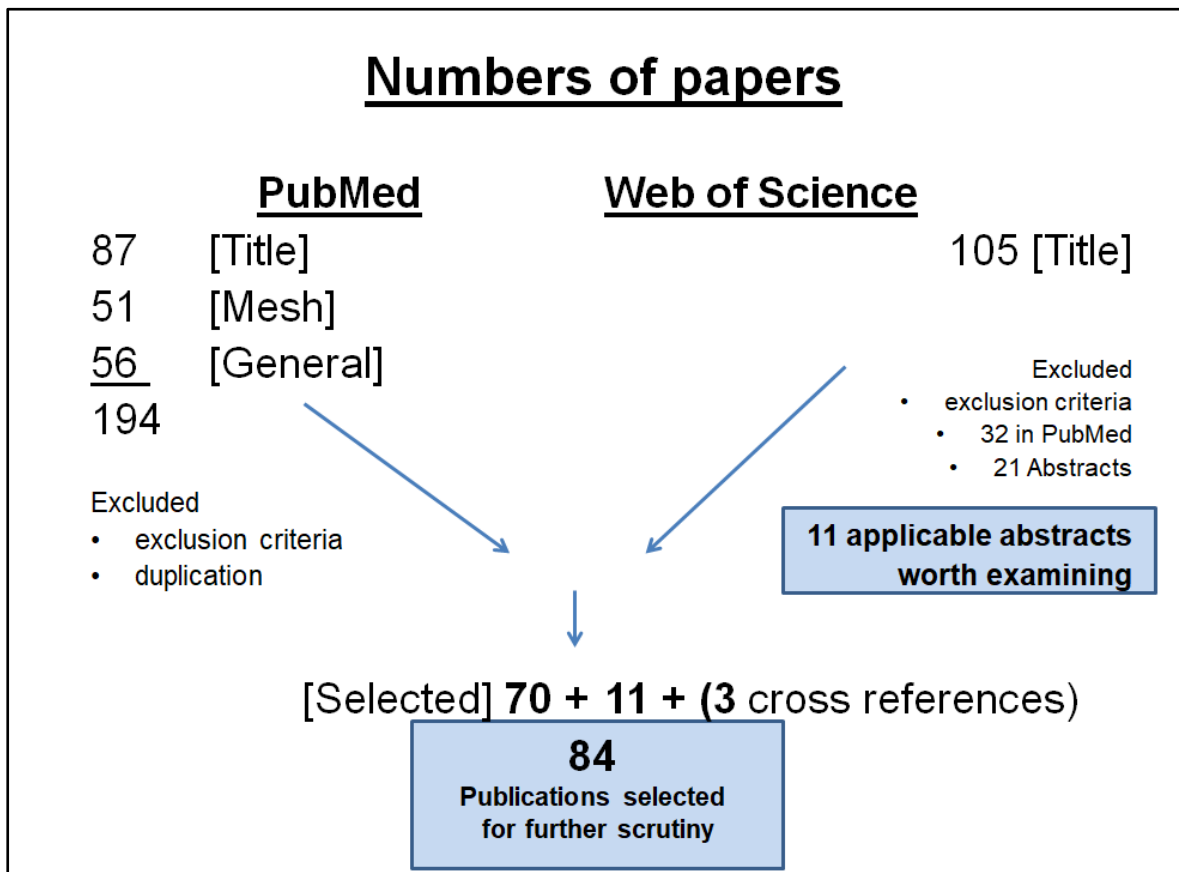

Supplement: inline-supplementary-material-1 [file inline-supplementary-material-1.pdf]
